# Supplementary material
Source: Research Square preprint supplement (doi:10.21203/rs.3.rs-9392817/v1)
Supplement: Supplementary file 1 [file 5aabda21527f5b5765376fd5.docx]

**Highlights:**

- Producing precipitated calcium carbonate from industrial calcium-rich waste generated by sugar beet processing.
- Optimization of dilution ratio, contact time, chelating agents’ concentration, and solution pH.
- Achieving the removal order of Ti>Cr>Zn>Cu>Fe>Si>Al>Hg>Pb>Mn>Mg at alkaline condition.
- Controlling the dilution ratio and pH was more important than the chelating agents’ concentration and contact time.
- pH and the dilution ratio had the greatest impact on the removal of titanium, chromium, zinc, and aluminum.
