# Supplementary material
Source: Research Square preprint supplement (doi:10.21203/rs.3.rs-9392817/v1)

**Graphical Abstract**


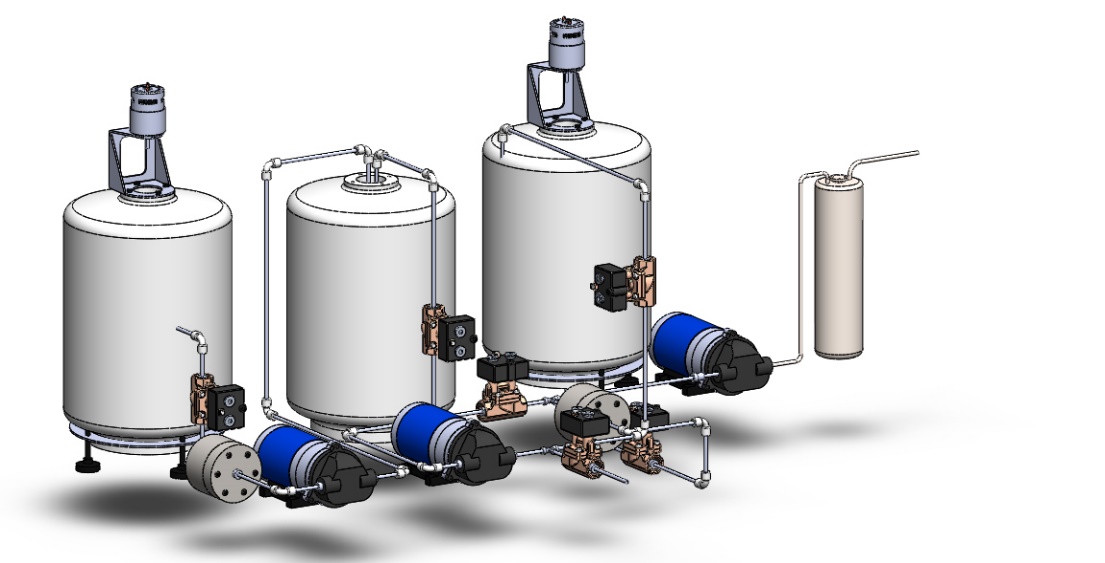


**Heavy metals remediation**

**CSTR**

**reactor**

**Time**

**EDTA Conc.**

**Carbonation**

**Mixing tank**

**Dilution**

**pH**

**Mixing tank**

**Calcination**

**Drying**

Calcium-rich waste

Purified CaCO3


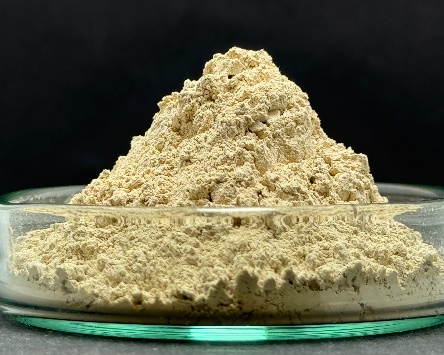

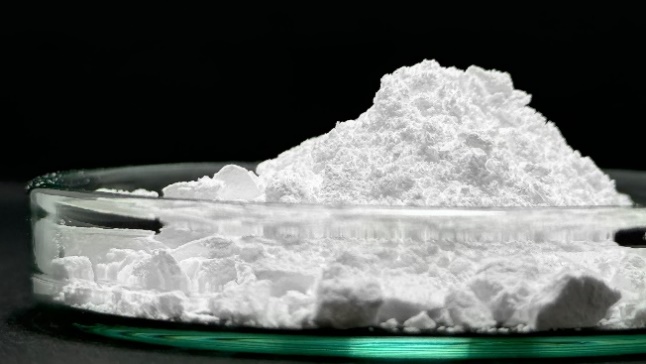

Supplement: Supplementary file 2 [file ad8afddca28ba83e77f6ecc9.docx]
